# Supplementary material for: The controlled deposition of metal oxides onto carbon nanotubes by atomic layer deposition: examples and a case study on the application of V2O4 coated nanotubes in gas sensing
Source: Royal Society of Chemistry journal article supplement (doi:10.1039/b821555c), 2009-01-01
Supplement: b821555c.pdf [file b821555c.pdf]

## Supporting Information

### **The controlled deposition of metal oxides onto carbon nanotubes by atomic layer deposition: Examples and a case study on the application of V<sub>2</sub>O<sub>4</sub> coated nanotubes in gas sensing.**

Marc-Georg Willinger,<sup>a,b</sup> Giovanni Neri,<sup>\*,c</sup> Anna Bonavita,<sup>c</sup> Giuseppe Micali,<sup>c</sup> Erwan Rauwel,<sup>a</sup>  
Tobias Hertrich,<sup>a</sup> and Nicola Pinna<sup>\*,a,d</sup>

<sup>a</sup> Department of Chemistry, CICECO, University of Aveiro, 3810-193 Aveiro, Portugal.

<sup>b</sup> Fritz Haber Institute of the Max Planck Society, Department of Inorganic Chemistry, Faradayweg 4-6, 14195 Berlin, Germany.

<sup>c</sup> Department of Industrial Chemistry and Materials Engineering, University of Messina, Contrada di Dio, Vill. S. Agata, 98166 Messina, Italy.

<sup>d</sup> School of Chemical and Biological Engineering, College of Engineering, Seoul National University (SNU), Seoul 151-744, Korea

Corresponding Author:

Giovanni Neri, FAX: (+39) 090 3977464, EMAIL: [neri@ingegneria.unime.it](mailto:neri@ingegneria.unime.it)

Nicola Pinna, FAX: (+351) 234401470, EMAIL: [pinna@ua.pt](mailto:pinna@ua.pt)

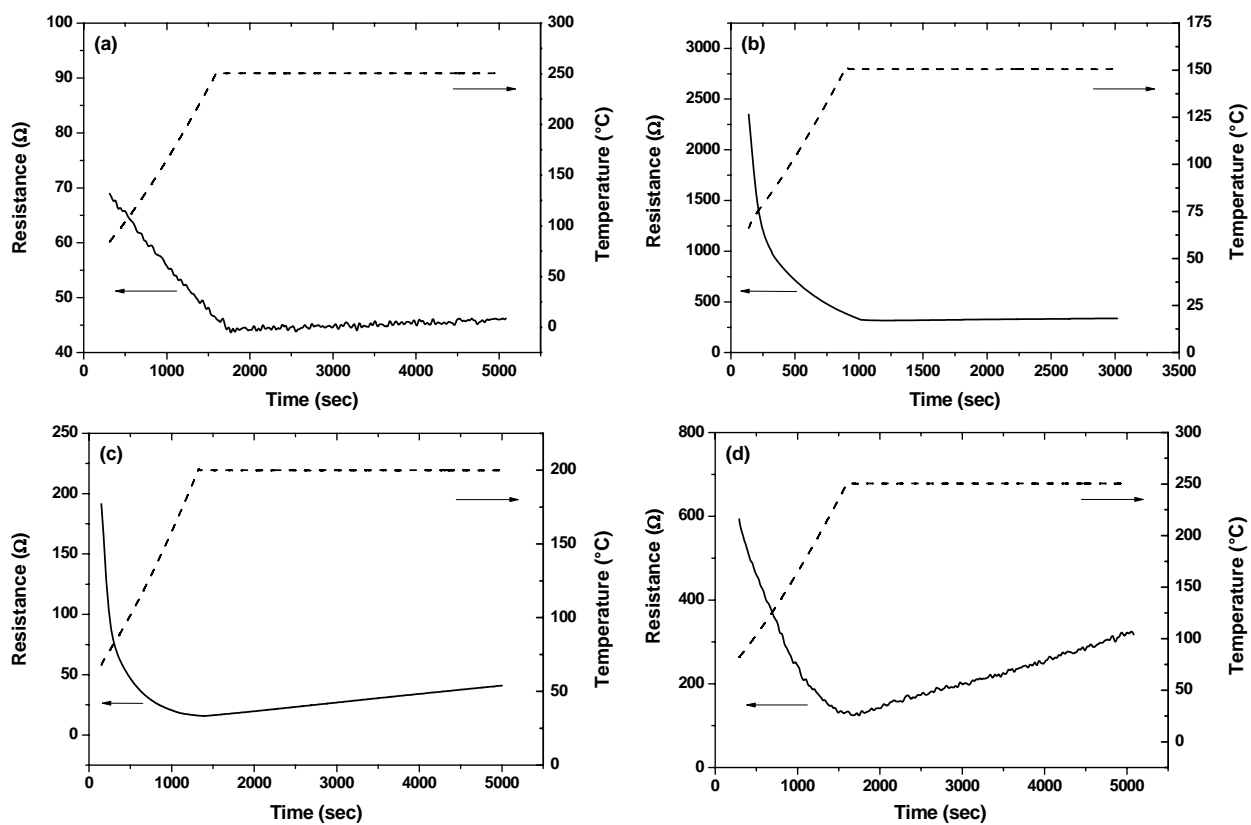

Fig. SI-1 Resistance trend of CNTs (a) and V<sub>2</sub>O<sub>4</sub>-CNTs (V<sub>2</sub>O<sub>4</sub> thickness 5 nm) (b,c,d) based sensors treated in air at a controlled heating rate.

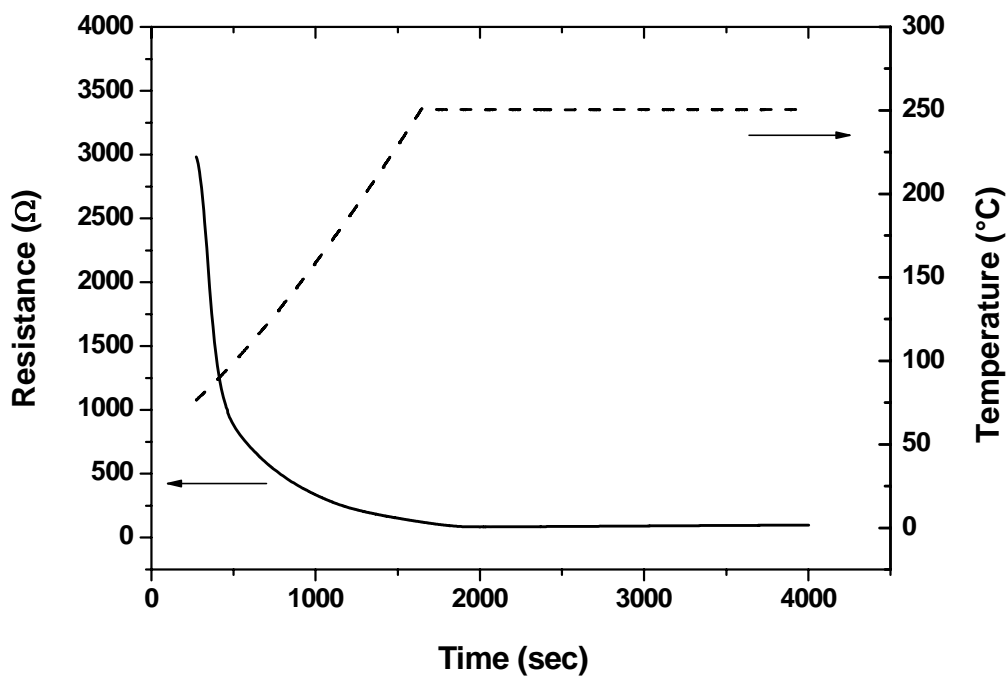

Fig. SI-2 Resistance trend of the  $V_2O_4$ -CNTs ( $V_2O_4$  thickness 5 nm) sensor treated in nitrogen at a controlled heating rate.
